# Supplementary material for: Can implementation failure or intervention failure explain the result of the 3D multimorbidity trial in general practice: mixed-methods process evaluation
Source: PubMed Central journal article supplement (PMC6858134; doi:10.1136/bmjopen-2019-031438), 2019-11-06
Supplement: bmjopen-2019-031438supp004.pdf [file bmjopen-2019-031438supp004.pdf]

## Appendix 4: Electronic monitoring of review component delivery

| Practice                                     | Penn | Priestman | Sharples | McReady | Harvey | Blackwell | Guppy | Lovell | Tohill | Beddoes | Dunbar | Plimsoil <sup>1</sup> | Carpenter | Davy | Cabot | Martineau | ALL |
|----------------------------------------------|------|-----------|----------|---------|--------|-----------|-------|--------|--------|---------|--------|-----------------------|-----------|------|-------|-----------|-----|
| 3d agenda printed                            | 97%  | 92%       | 100%     | 89%     | 97%    | 81%       | 95%   | 98%    | 98%    | 100%    | 100%   | 70%                   | 97%       | 58%  | 100%  | 92%       | 96% |
| 3d health plan printed                       | 77%  | 81%       | 97%      | 91%     | 62%    | 31%       | 23%   | 100%   | 80%    | 98%     | 85%    | 39%                   | 85%       | 80%  | 98%   | 67%       | 83% |
| adherence meds                               | 95%  | 61%       | 94%      | 96%     | 65%    | 92%       | 63%   | 100%   | 39%    | 67%     | 62%    | 44%                   | 54%       | 50%  | 93%   | 64%       | 71% |
| EQ5D pain                                    | 47%  | 97%       | 100%     | 71%     | 100%   | 96%       | 65%   | 52%    | 100%   | 98%     | 100%   | 5%                    | 100%      | 100% | 100%  | 95%       | 83% |
| GP first goal noted                          | 100% | 97%       | 100%     | 100%    | 76%    | 96%       | 100%  | 100%   | 102%   | 98%     | 102%   | 44%                   | 100%      | 95%  | 93%   | 97%       | 94% |
| Most important problem on nurse view         | 100% | 97%       | 100%     | 100%    | 100%   | 96%       | 100%  | 100%   | 100%   | 100%    | 100%   | 100%                  | 100%      | 100% | 100%  | 97%       | 99% |
| Pharmacist comment                           | 84%  | 100%      | 95%      | 82%     | 105%   | 78%       | 83%   | 100%   | 107%   | 106%    | 100%   | 38%                   | 78%       | 43%  | 100%  | 102%      | 88% |
| Pharmacist comments noted?                   |      | 56%       | 53%      |         | 47%    | 77%       |       |        | 68%    | 69%     | 92%    |                       | 56%       | 80%  | 95%   | 64%       | 69% |
| PHQ9 done                                    | 97%  | 97%       | 100%     | 91%     | 91%    | 96%       | 98%   | 100%   | 98%    | 98%     | 100%   | 100%                  | 97%       | 94%  | 100%  | 103%      | 98% |
| what GP can do about main problem            | 92%  | 89%       | 100%     | 98%     | 71%    | 73%       | 98%   | 76%    | 100%   | 89%     | 102%   | 33%                   | 87%       | 80%  | 90%   | 72%       | 84% |
| what patient can do about main problem noted | 77%  | 92%       | 86%      | 96%     | 76%    | 73%       | 100%  | 91%    | 100%   | 93%     | 100%   | 39%                   | 97%       | 85%  | 90%   | 78%       | 86% |
| 3D participants Pharmacist comment           | 84%  | 100%      | 95%      | 82%     | 105%   | 78%       | 83%   | 100%   | 107%   | 106%    | 100%   | 38%                   |           | 43%  | 100%  | 102%      | 88% |

Key: Range of fidelity from red (worst) to green (best)

Grey-shaded column headers indicate case study practices

Practice ID: 60 = Harvey; 46 = Lovell; 26 = Beddoes; 69 = Davy

Some values are greater than 100% because percentages were calculated based on the number of participants remaining in the trial at the end

<sup>1</sup>This practice stopped delivering the intervention and withdrew from the process evaluation
